# Supplementary material for: The Long Noncoding RNA LOC441461 (STX17-AS1) Modulates Colorectal Cancer Cell Growth and Motility
Source: PubMed Central journal article supplement (PMC7692211; doi:10.3390/cancers12113171), 2020-10-28
Supplement: cancers-12-03171-s001.pdf [file cancers-12-03171-s001.pdf]

Article

# The Long Noncoding RNA LOC441461 (STX17-AS1) Modulates Colorectal Cancer Cell Growth and Motility

Jui-Ho Wang, Tzung-Ju Lu, Mei-Lang Kung, Yi-Fang Yang, Chung-Yu Yeh, Ya-Ting Tu, Wei-Shone Chen and Kuo-Wang Tsai

Supplementary Materials

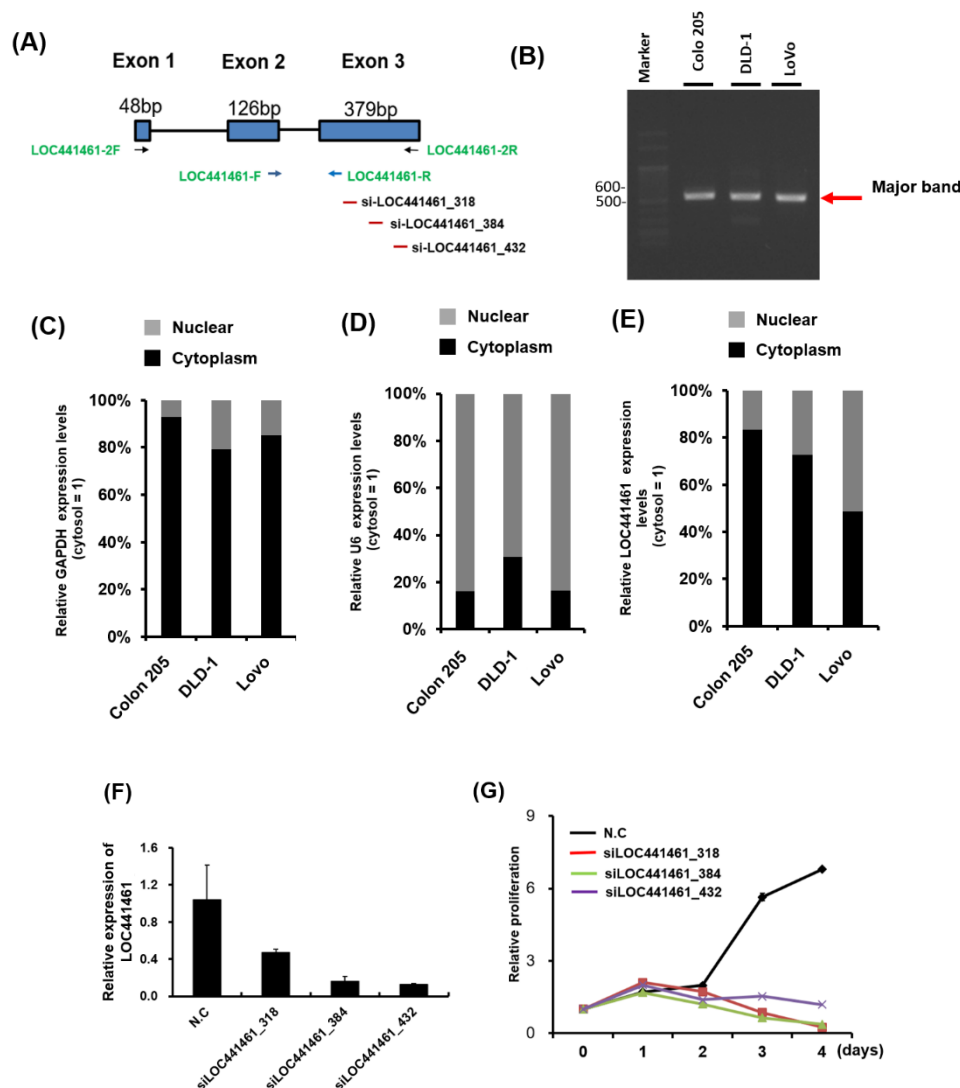

**Figure S1.** LOC441461 knockdown suppressed colon cancer growth in SW620 cells. (A) Schema of the locations of four PCR primers used for LOC441461 amplification and three siRNA sequences designed for LOC441461 knockdown in this study. The gene structure of LOC441461 was obtained from the human genome database of the University of California, Santa Cruz. (B) The putative transcript of LOC441461 was identified using PCR with the LOC441461-2F/-2R primer in this study. (C,D,E) RNA expression levels of GAPDH, U6, and LOC441461 candidates, respectively, in the nucleus and cytoplasm were measured using RT-PCR. GAPDH acted as a marker for the cytoplasm, and U6 acted as a nuclear marker. (F) After transfection with individual siRNA (si-LOC441461\_318,

si-LOC441461\_384, and si-LOC441461\_432), LOC441461 expression levels were examined using RT-PCR. (G) Cell proliferation was assessed in the SW620 cells with LOC441461 knockdown by using three individual siRNAs.

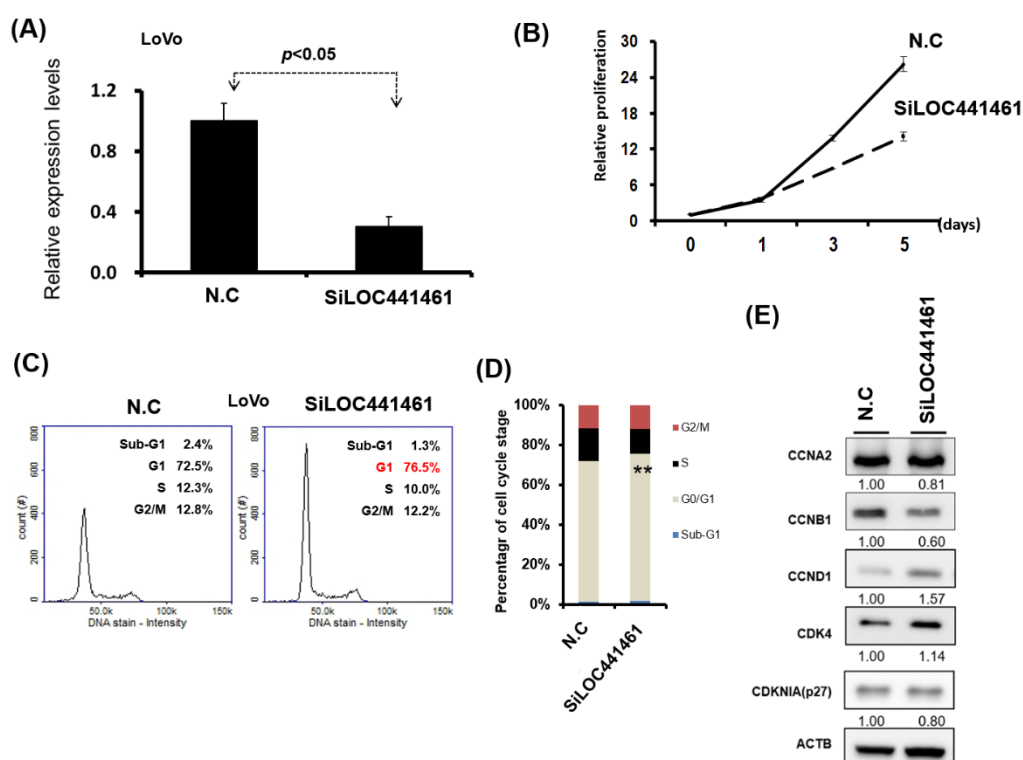

**Figure S2.** LOC441461 knockdown suppressed LoVo cell growth by impairing cell cycle progression. (A) LOC441461 expression levels were examined using RT-PCR in LoVo cells with si-LOC441461 transfection. (B) Cell proliferation compared with the scrambled control was measured using the CellTiter-Glo One Solution assay at various time points (0, 1, 3, and 5 days). (C) The distribution of cells in three phases of the cell cycle was examined using the image flow cytometry assay. (D) Graph of each quantified phase. (E) Cell-cycle-related protein levels were examined using the Western blotting assay in LoVo cells with and without LOC441461 knockdown. All experiments were performed in triplicate, and these data were analyzed using Student's *t* test. The difference was considered significant when  $p < 0.05$ .

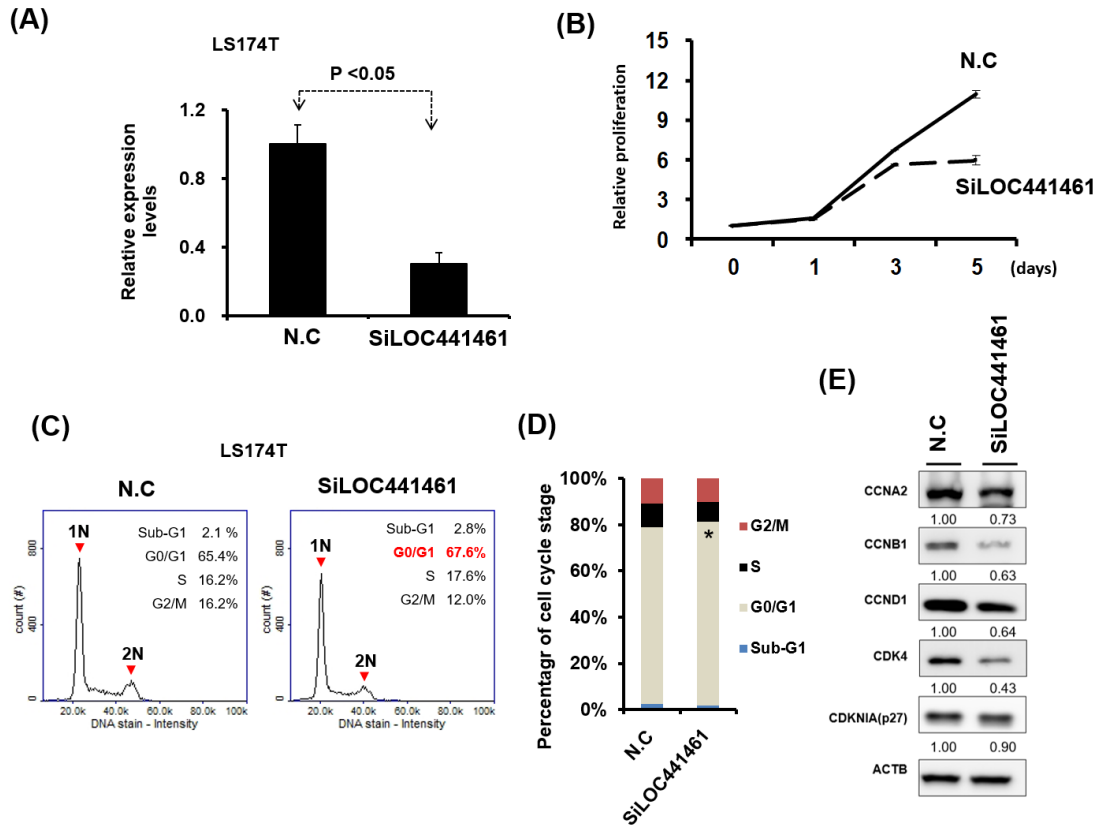

**Figure S3.** LOC441461 knockdown suppressed LS174T cell growth by impairing cell cycle progression. (A) LOC441461 expression levels were examined using RT-PCR in LS174T cells with si-LOC441461 transfection. (B) Cell proliferation compared with the scrambled control was measured using the CellTiter-Glo One Solution assay at various time points (0, 1, 3, and 5 days). (C) The distribution of cells in three phases of the cell cycle was examined using the image flow cytometry assay. (D) Graph of each quantified phase. (E) Cell-cycle-related protein levels were examined using the Western blotting assay in LS174T cells with and without LOC441461 knockdown. All experiments were performed in triplicate, and these data were analyzed using Student's t test. The difference was considered significant when  $p < 0.05$ .

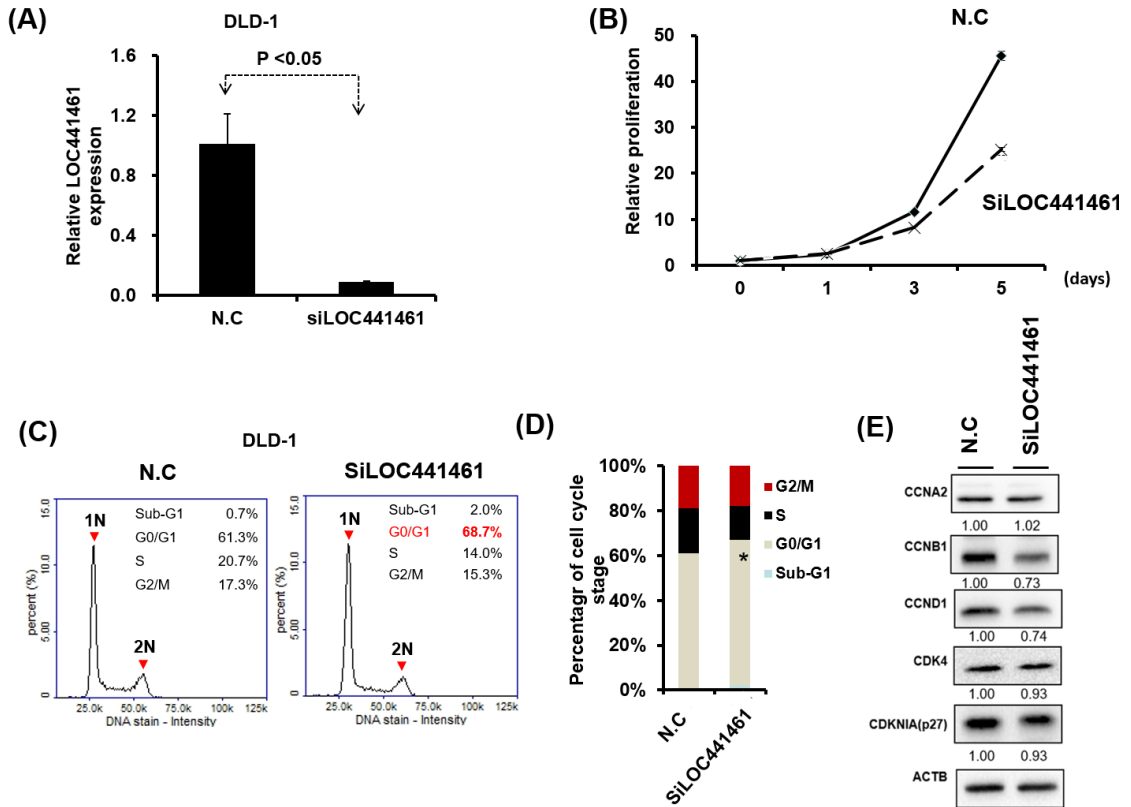

**Figure S4.** LOC441461 knockdown suppressed DLD-1 cell growth by impairing cell cycle progression. (A) LOC441461 expression levels were examined using RT-PCR in DLD-1 cells with si-LOC441461 transfection. (B) Cell proliferation compared with the scrambled control was measured using the CellTiter-Glo One Solution assay at various time points (0, 1, 3, and 5 days). (C) The distribution of cells in three phases of the cell cycle was examined using the image flow cytometry assay. (D) Graph of each quantified phase. (E) Cell-cycle-related protein levels were examined using the Western blotting assay in DLD-1 cells with and without LOC441461 knockdown. All experiments were performed in triplicate, and these data were analyzed using Student's t test. The difference was considered significant when  $p < 0.05$ .

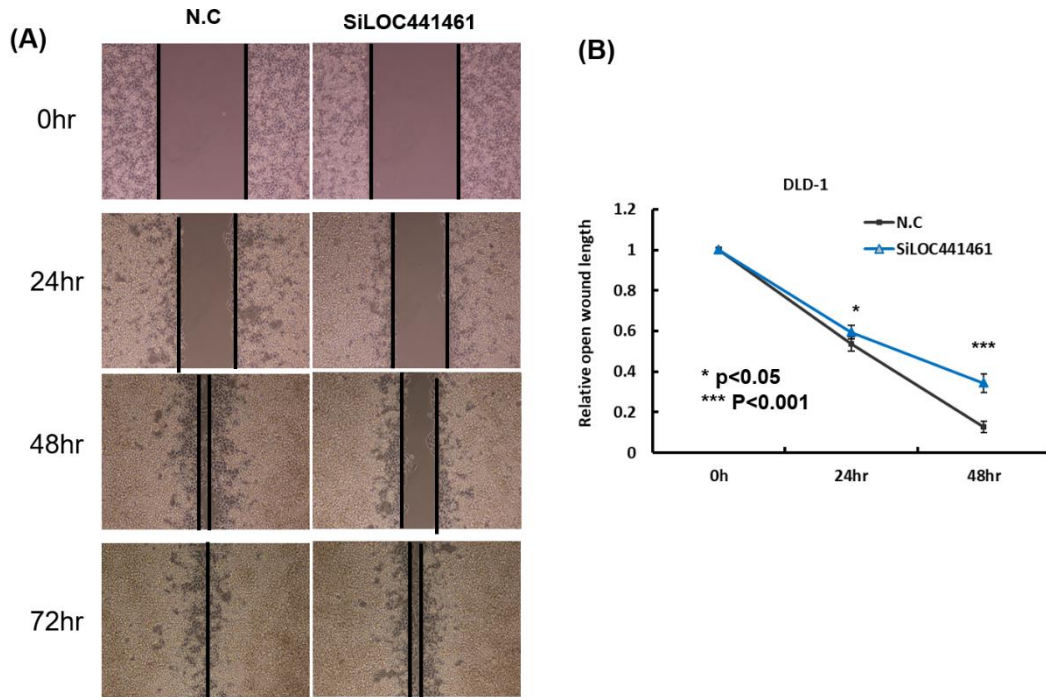

**Figure S5.** LOC441461 knockdown suppressed DLD-1 cell wound healing ability. (A) The wound healing assay was performed in DLD-1 cells transfected with siLOC441461 and the scrambled control (N.C.). (B) The relative migration ability was quantified by calculating the open wound length.

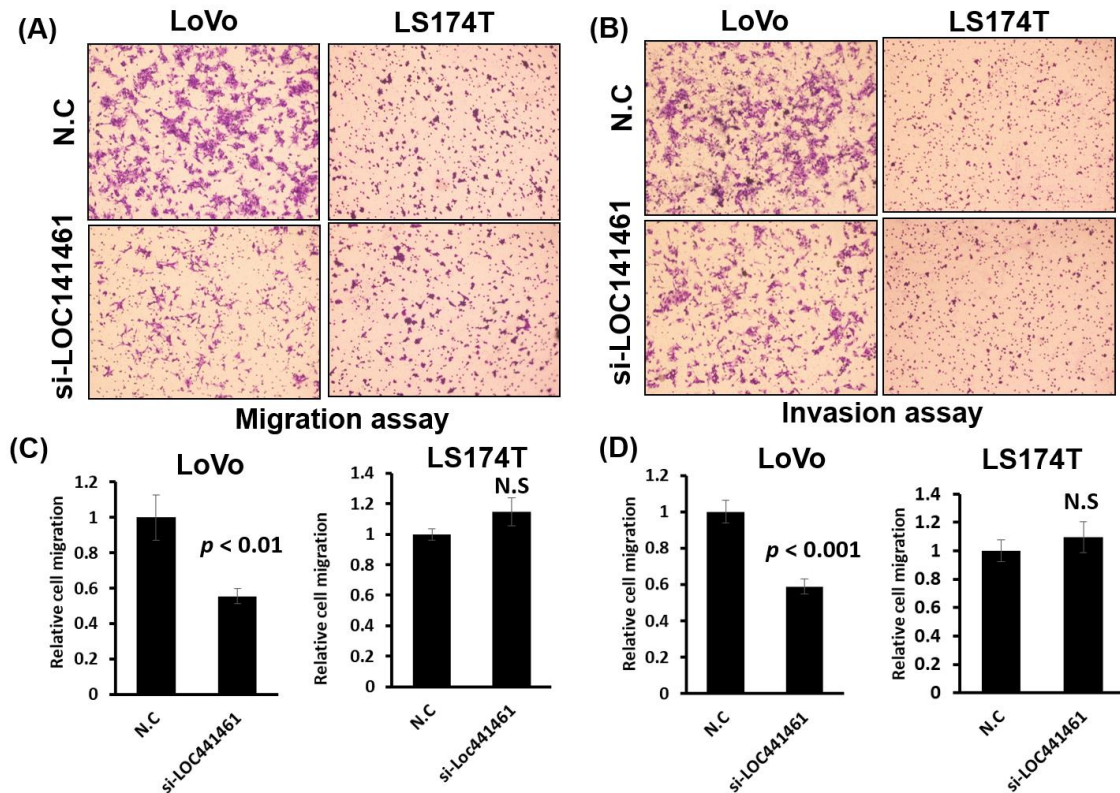

**Figure S6.** Effects of LOC441461 knockdown on the invasion and migration abilities of LoVo and LS174T cells. (A) and (B) After the knockdown of LOC441461 in LoVo and LS174T cells, their migration and invasion abilities were assessed using the transwell assay. (C) and (D) The migration and invasion abilities were further quantified using the Ascent software. The difference was considered significant when  $p < 0.05$ . All experiments were performed in triplicate, and these data

were analyzed using Student's t test. The difference was considered significant when  $p < 0.05$ . N.S. = not significant.

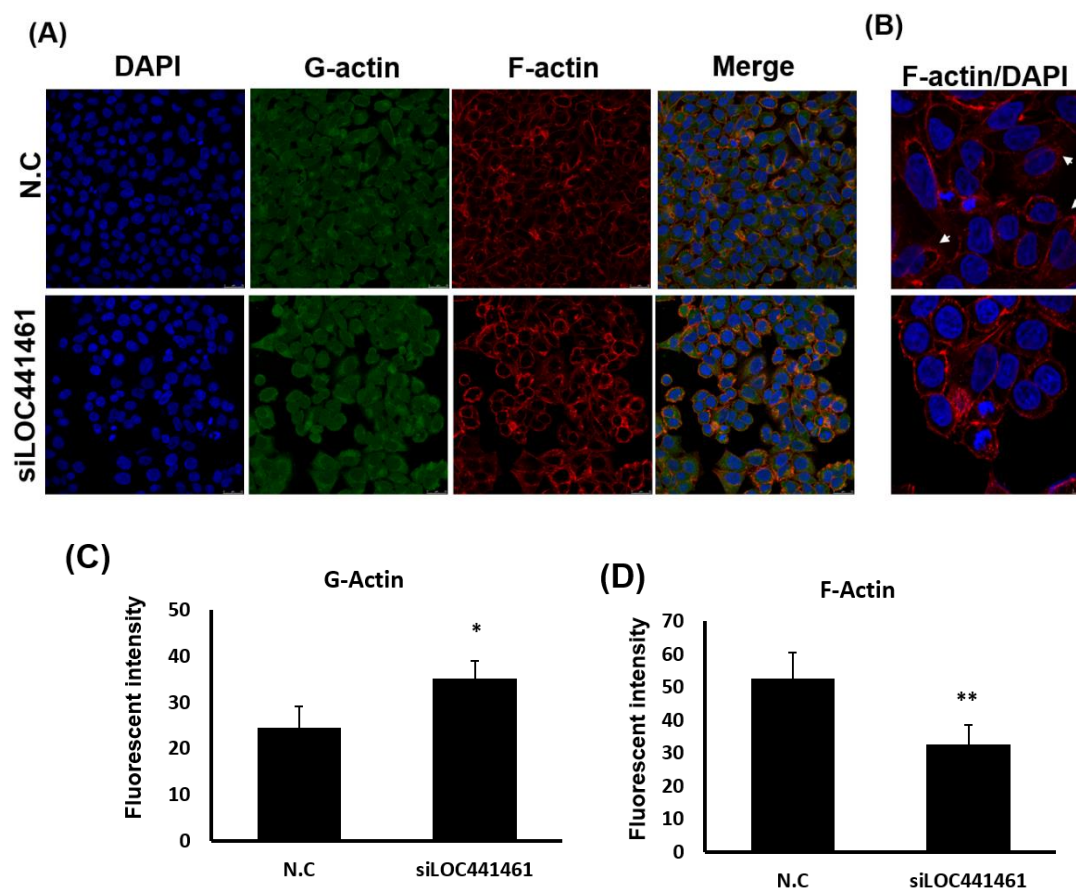

**Figure S7.** LOC441461 knockdown suppressed colon cancer cell motility through G-actin and F-actin polymeration. **(A)** DLD-1 cells treated with or without siLOC441461 siRNA were stained with rhodamine phalloidin, Alexa Fluor 488 DNase I conjugate, and 4',6-diamidino-2-phenylindole for the detection of F-actin (red), G-actin (green), and nuclear (blue). **(B)** F-actin labeling with rhodamine phalloidin revealed that DLD-1 cells exhibited numerous filopodia, and the LOC441461-knockdown cells exhibited fewer filopodium fibers than the DLD-1 cells did. **(C)** and **(D)** The fluorescent intensity of G-actin and F-actin was calculated using a confocal microscope ( $n = 3$ ).



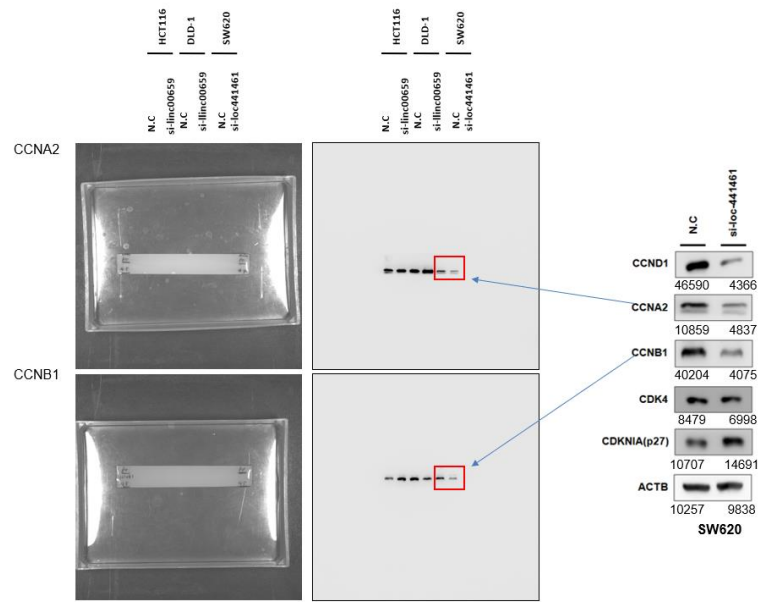

(A)

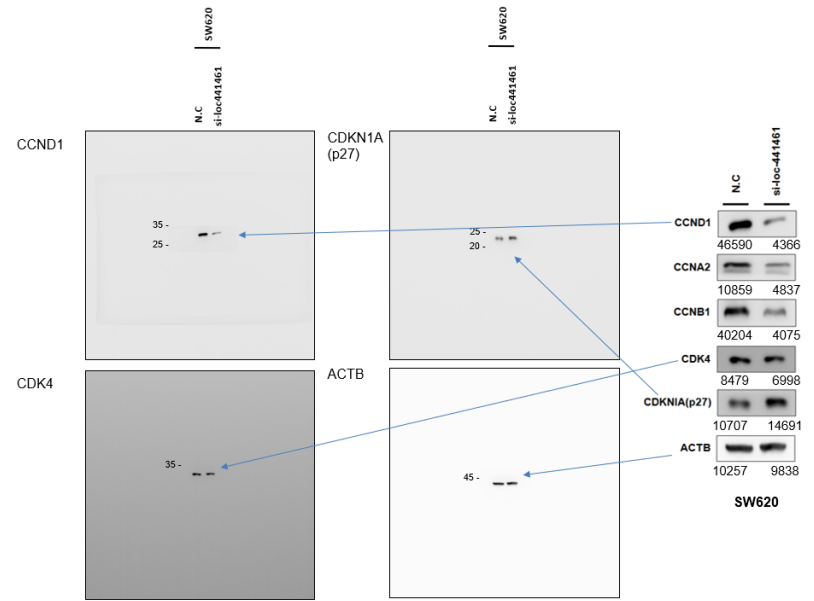

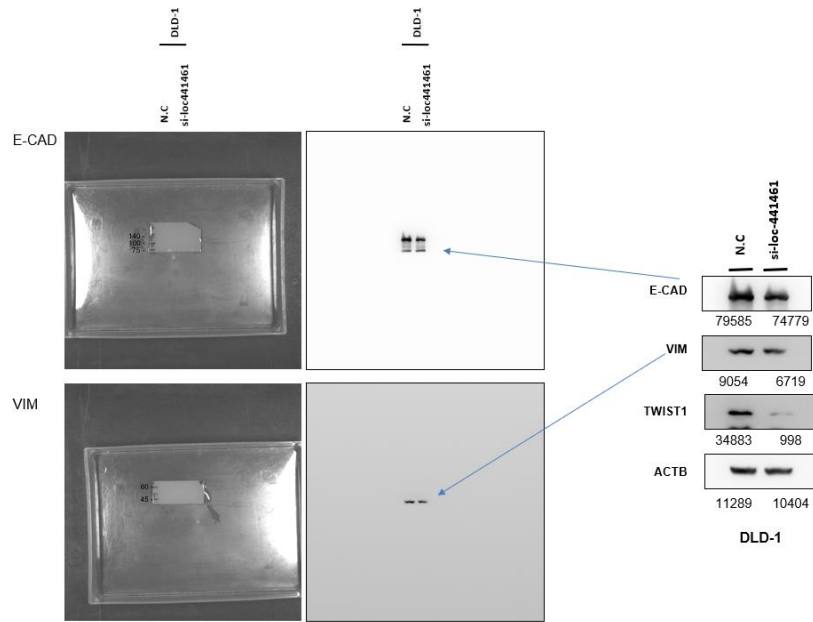

(B)

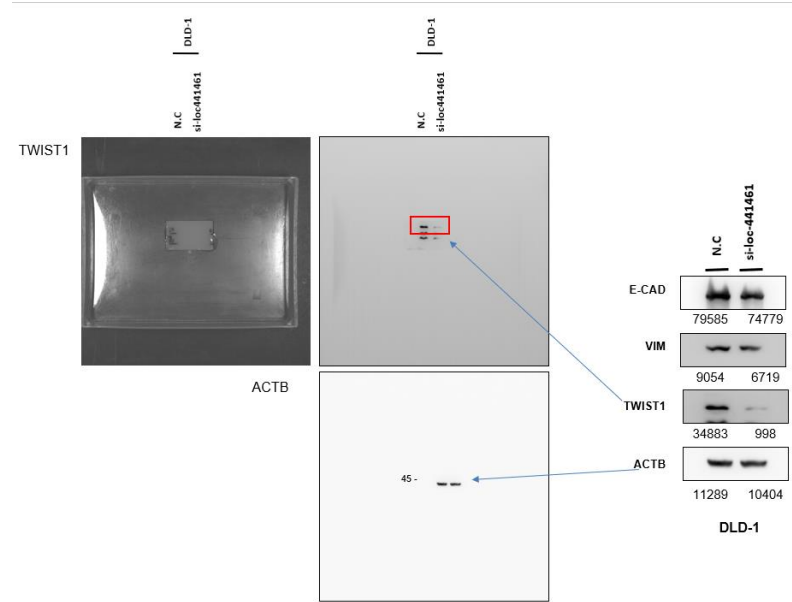



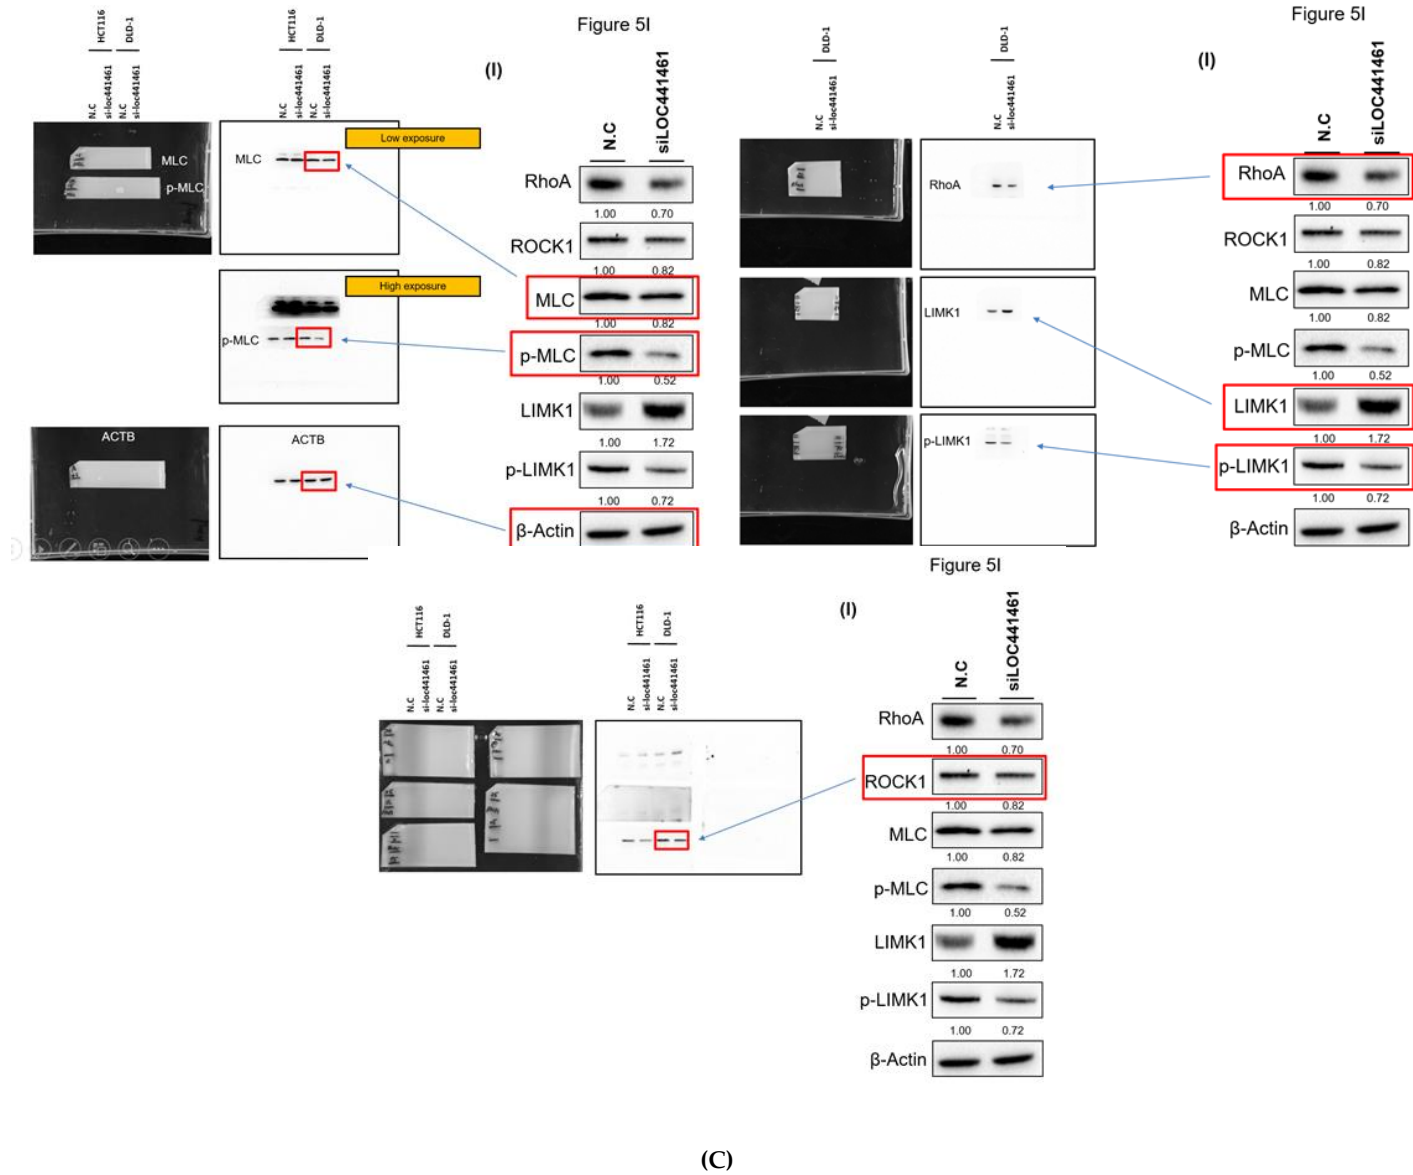

**Figure S8.** Whole Western Blots. (A) Figure 4D (B) Figure 5G (C) Figure 5I.

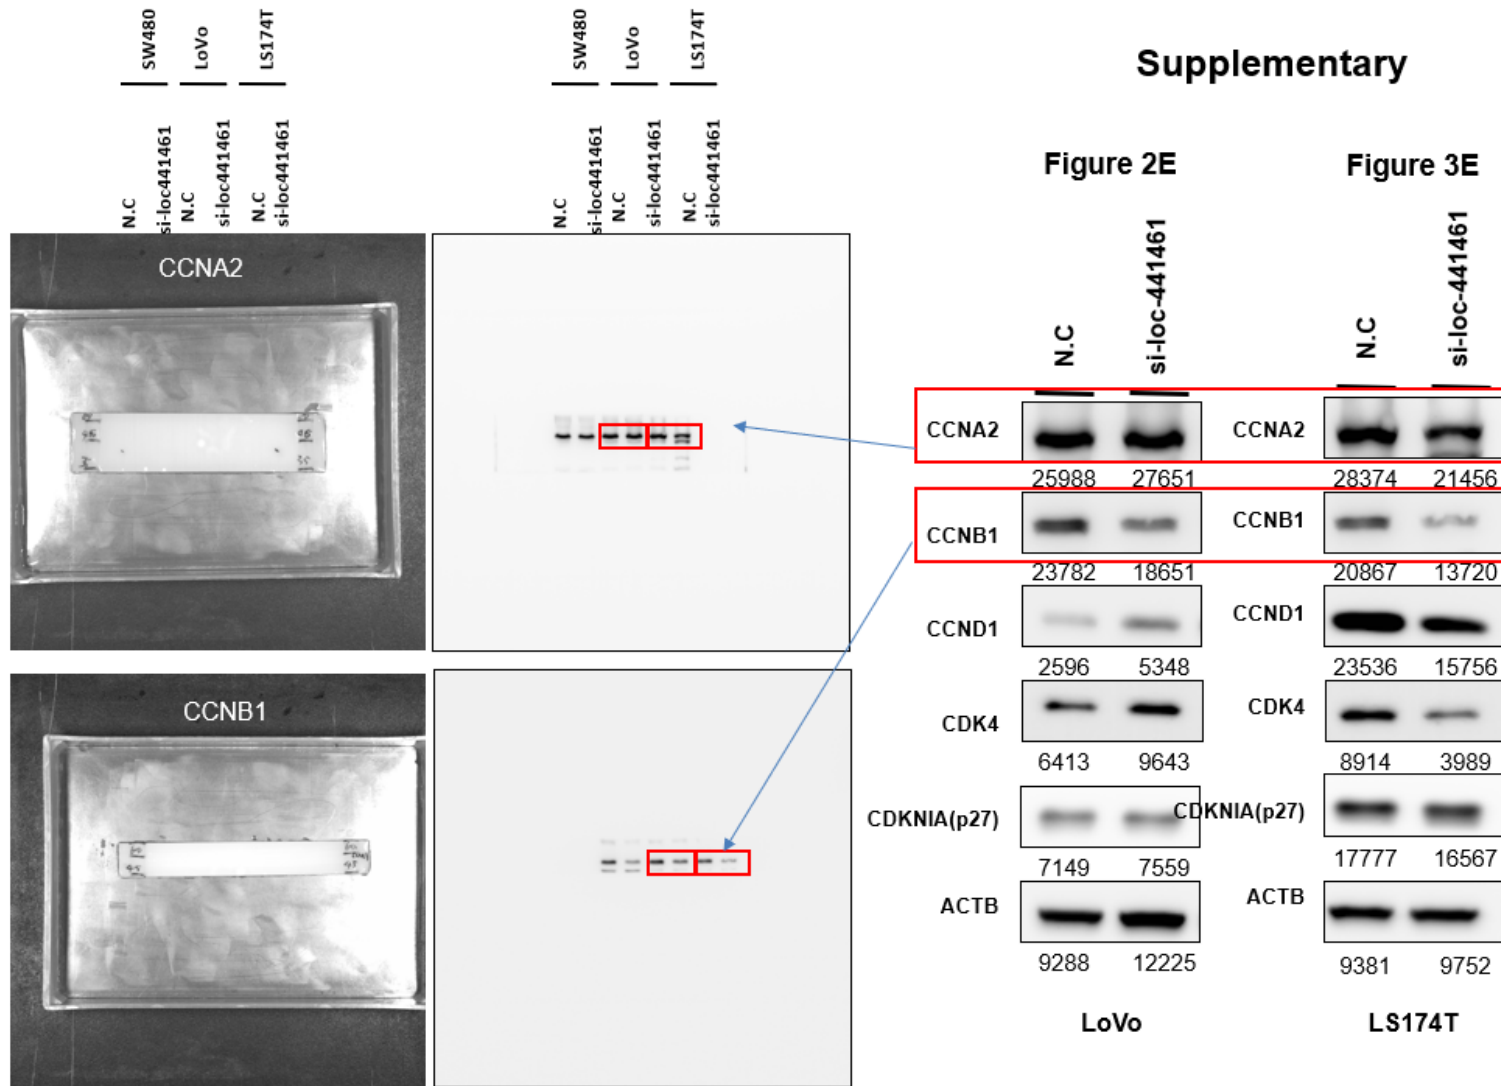

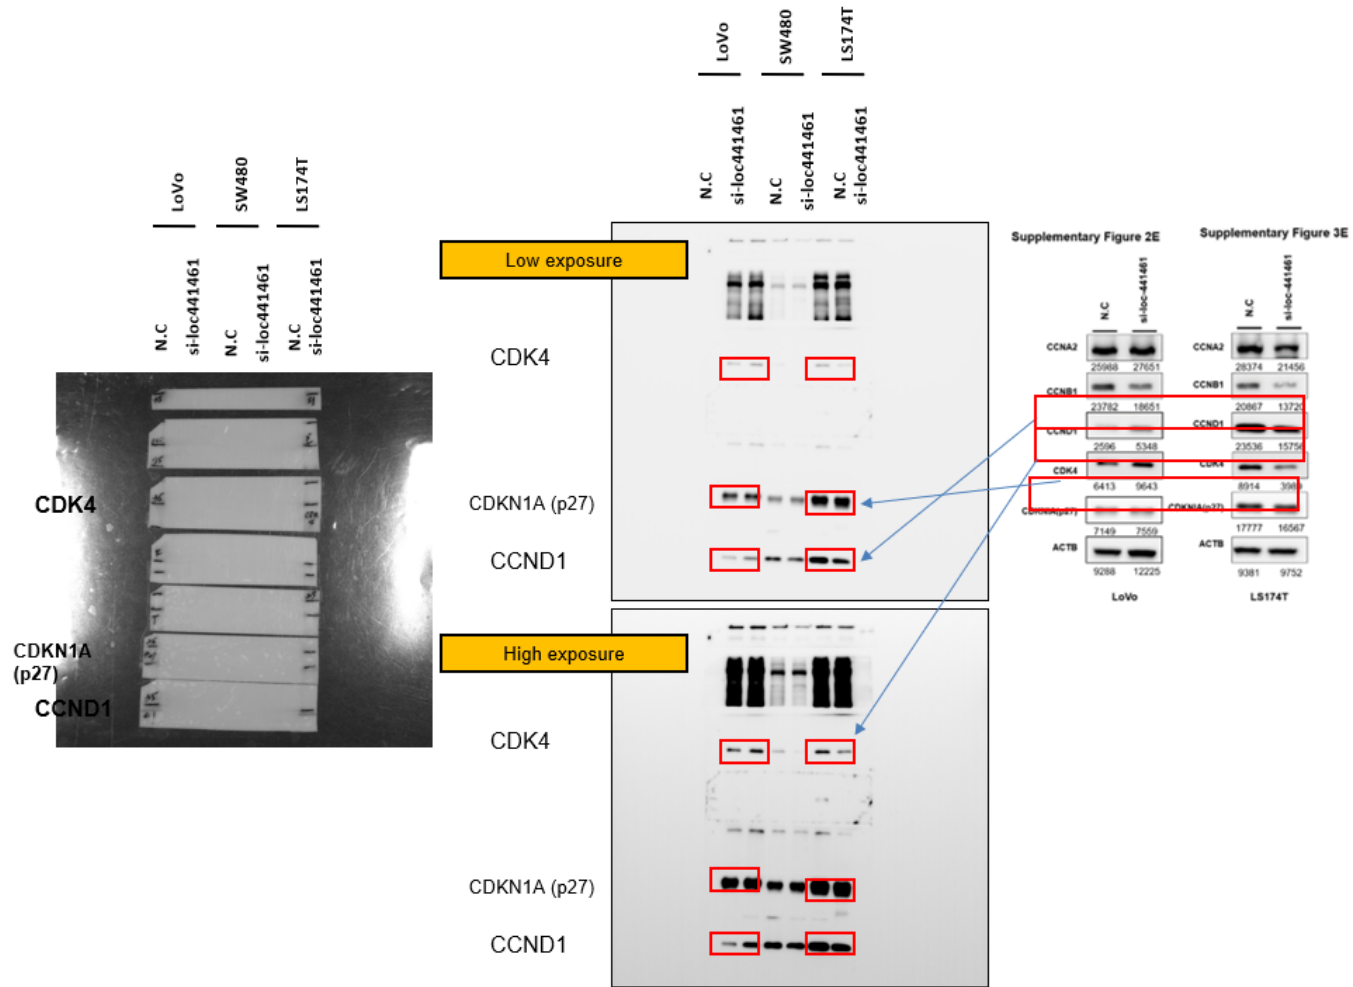

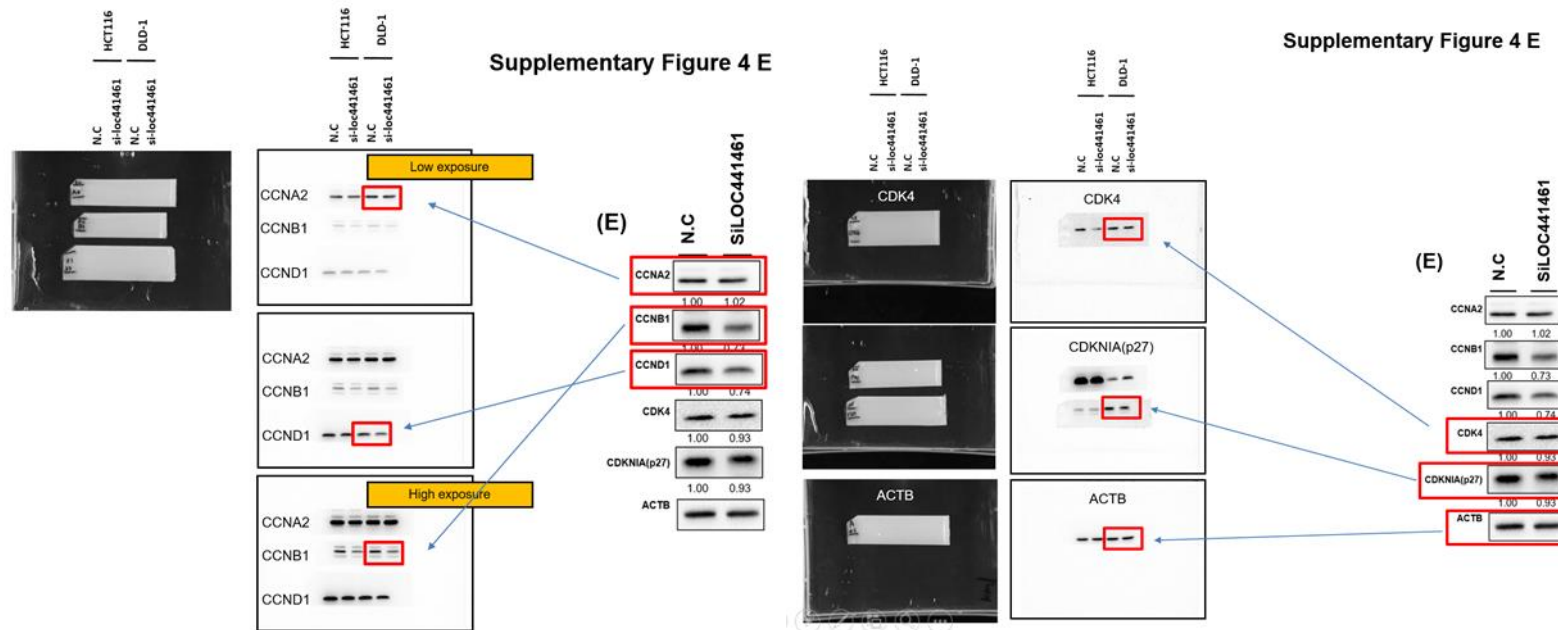

Figure S9. Whole Western Blots for Supplementary Figures.

**Table S1.** Results of the pathway enrichment analysis of the differentially expressed genes.

| Gene Ontology      | Signaling Pathway                                             | p Value               |
|--------------------|---------------------------------------------------------------|-----------------------|
| Biological process | protein targeting to mitochondrion                            | $4.79 \times 10^{-5}$ |
|                    | protein transport                                             | 0.00931               |
|                    | regulation of cell shape                                      | 0.009792              |
|                    | intracellular protein transport                               | 0.013446              |
|                    | cellular response to nerve growth factor stimulus             | 0.014592              |
|                    | small GTPase mediated signal transduction                     | 0.015829              |
|                    | transferrin transport                                         | 0.018386              |
|                    | COPI coating of Golgi vesicle                                 | 0.023611              |
|                    | positive regulation of cholesterol storage                    | 0.040956              |
|                    | cellular response to laminar fluid shear stress               | 0.04667               |
|                    | macropinocytosis                                              | 0.04667               |
|                    | regulation of Golgi organization                              | 0.04667               |
|                    | G2/M transition of mitotic cell cycle                         | 0.048495              |
| Cellular component | Golgi membrane                                                | $1.38 \times 10^{-4}$ |
|                    | Golgi apparatus                                               | 0.00125               |
|                    | intracellular                                                 | 0.001381              |
|                    | endoplasmic reticulum-Golgi intermediate compartment membrane | 0.005845              |
|                    | membrane                                                      | 0.005856              |
|                    | endosome                                                      | 0.009396              |
|                    | intracellular membrane-bounded organelle                      | 0.040597              |
| Molecular function | protein binding                                               | 0.004797              |
|                    | protein kinase binding                                        | 0.020343              |
|                    | GTPase activator activity                                     | 0.021513              |
|                    | GTP binding                                                   | 0.02229               |
|                    | SH3 domain binding                                            | 0.030391              |

**Text S1:** Supplementary Materials and Methods*Immunofluorescence of Actin Staining*

DLD-1 cells with LOC441461 knockdown were seeded on coverslips. The cells were fixed for 15 min at room temperature in 2.0% paraformaldehyde in PBS, washed thrice with PBS, and then permeabilized for 10 minutes at room temperature in PBS containing 0.1% Triton X-100. The cells were labeled with rhodamine phalloidin and Alexa Fluor 488 DNaseI (1:500; Molecular Probes) for 30 min at room temperature. For nuclear staining, cells were treated with 4',6-diamidino-2-phenylindole. Coverslips were mounted onto microscope slides covered with antifade reagent. Images were captured using a Zeiss LSM510 META (Carl Zeiss Microscopy, Jena, Germany) confocal microscope.

*Subcellular Fractionation Localization*

The nuclear and cytosolic fractions were separated using the PARIS kit (Life Technologies, Thermo Fisher Scientific Inc., Waltham, MA, USA) according to the manufacturer's instructions. Then, RNA was extracted using TRIZOL (Invitrogen, Grand Island, NY, USA), and 2 µg of total RNA was reverse-transcribed using random primers and SuperScript III Reverse Transcriptase (Invitrogen, Grand Island, NY, USA). Finally, RT-PCR was performed to determine the expression level of LOC441461. U6 was used as the nuclear marker, and GAPDH was used as the cytosolic fraction marker.

U6-F: 5'-CTCGCTTCGGCAGCACA-3';

U6-R: 5'-AACGCTTCACGAATTTGCGT-3';

GAPDH-F: 5'-TGCACCACCAACTGCTTAGC-3';

GAPDH-R: 5'-GGCATGGACTGTGGTCATGAG-3';

LOC441461-F: 5'-TGATAAGCTGTTTAAACCAGAACCG-3'; and

LOC441461-R: 5'-GGCAACATTTTCAGTTCAGTG-3'.

### Wound Healing Assay

For the wound healing assay, after transfection with si-LOC441461 or negative control for 72 h, cells ( $1.5 \times 10^6$ ) were seeded on six-well plates. A straight line was scratched on the monolayer in the middle of the well by using the tip of a 200 mL pipette. Culture medium comprising 10% FBS was replaced with serum deprivation culture medium, and cells were then incubated at 37 °C. Wound closure was monitored and photographed at different time points under a microscope. Subsequently, the open area was assessed for quantifying cell migration ability.

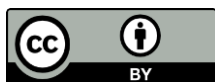

© 2020 by the authors. Licensee MDPI, Basel, Switzerland. This article is an open access article distributed under the terms and conditions of the Creative Commons Attribution (CC BY) license (<http://creativecommons.org/licenses/by/4.0/>).
